## Familial risk of postpartum psychosis

**Authors:** Adrianna P. Kępińska<sup>1,2,3</sup>, Thalia K. Robakis<sup>2</sup>, Keith Humphreys<sup>4</sup>, Xiaoqin Liu<sup>5</sup>, René S. Kahn<sup>2</sup>, Trine Munk-Olsen<sup>5</sup>, Veerle Bergink<sup>2,6\*</sup>, Behrang Mahjani<sup>1,2,3,4,7,8,9\*</sup>

**Corresponding author:** Behrang Mahjani

behrang.mahjani@mssm.edu

One Gustave L. Levy Place

Box 1230

New York, NY 10029

Tel: 212 659 1670

\* Shared authors

### Affiliations

<sup>1</sup>Seaver Autism Center for Research and Treatment, Icahn School of Medicine at Mount Sinai, New York, NY, USA.

<sup>2</sup>Department of Psychiatry, Icahn School of Medicine at Mount Sinai, New York, NY, USA.

<sup>3</sup>Department of Genetics and Genomic Sciences, Icahn School of Medicine at Mount Sinai, New York, NY, USA.

<sup>4</sup>Department of Medical Epidemiology and Biostatistics, Karolinska Institutet, Stockholm, Sweden.

<sup>5</sup>National Center for Register-based Research, Aarhus BSS, Aarhus University, Aarhus V, Denmark.

<sup>6</sup>Department of Psychiatry, Erasmus Medical Center, Rotterdam, The Netherlands.

<sup>7</sup>The Mindich Child Health and Development Institute, Icahn School of Medicine at Mount Sinai, New York, NY, USA.

<sup>8</sup>Department of Artificial Intelligence and Human Health, Icahn School of Medicine at Mount Sinai, New York, NY, USA.

<sup>9</sup>Department of Molecular Medicine and Surgery, Karolinska Institutet, Stockholm.

**Word Count: 3054**

**Keywords:** postpartum psychosis, familial risk, bipolar disorder

## **Abstract**

**Background:** Postpartum psychosis, a mood disorder triggered by childbirth, is one of the most severe psychiatric conditions, with high risks of suicide and infanticide if untreated. While it is evident that genetic factors play a crucial role in disorder risk, the exact extent of their importance is yet to be determined.

**Methods:** This cohort study consisted of 1,633,535 birthing parents from the Swedish nationwide registers, of whom 2,489 (0.15%) experienced postpartum psychosis within three months of their first ever childbirth. We estimated the relative recurrence risk of postpartum psychosis for full siblings and cousins as a measure of familial, genetic, and environmental risk.

**Findings:** Relative recurrence risk of postpartum psychosis in full siblings was 13.77 (95% CI 8.52-20.91) when adjusted for age at birth. Although cousins showed an elevated relative recurrence risk, these results did not reach statistical significance (1.88 [95% CI 0.74-3.82]). In full siblings, the relative recurrence risk for severe postpartum psychosis requiring inpatient diagnosis was even higher than the risk for inpatient and outpatient diagnoses (18.13 [95% CI 11.12-27.57]).

**Interpretation:** Increased risk of postpartum psychosis in full siblings is likely due to a combination of genetic factors and shared environment. The elevated risk in cousin pairs, lower than in full siblings, highlights genetic impact because shared environmental effects are assumed to be minimal among cousins. However, caution is needed in interpreting the risk among cousins due to wide confidence intervals. Overall, our study supports the role of genetics and shared environment in the risk of postpartum psychosis.

## **Introduction**

Postpartum psychosis is one of the most severe psychiatric conditions, with increased risks of suicide and infanticide if untreated, and should thus be addressed as a medical emergency.<sup>1</sup> Postpartum psychosis usually occurs in the three months after childbirth, with the most frequent onset within one month.<sup>2–4</sup> The onset is rapid, and presentation is fluctuating, characterised by mood symptoms (mania and depression), psychotic symptoms, cognitive disorganization and confusion, severe anxiety, and sleep problems.<sup>1</sup> Despite its significant impact, postpartum psychosis continues to pose a challenge in terms of diagnosis and treatment, as it is not acknowledged as a separate disorder in the Diagnostic and Statistical Manual of Mental Disorders (DSM).<sup>1,5</sup>

The risk architecture of postpartum psychosis is notably insufficiently researched. As early as in one of the first systematic clinical monographs on women's perinatal mental health, *Treatise on Insanity in Pregnant, Postpartum, and Lactating Women* (1858), Louis-Victor Marcé theorised that individuals may be predisposed to mental illness through "hereditary antecedents", with pregnancy, delivery, or lactation as disorder triggers. However, while some research now indeed points to biological factors in postpartum psychosis, e.g., structural brain changes,<sup>6</sup> neuroimmune dysregulation,<sup>7,8</sup> and changes in the hypothalamic-pituitary-adrenal axis,<sup>9</sup> genetic findings are still largely absent. They are limited to research exploring polygenic scores in women with bipolar disorder and postpartum psychosis,<sup>10</sup> family studies of postpartum psychosis narrowly in patients with history of bipolar disorders,<sup>11,12</sup> candidate gene studies,<sup>13</sup> or genome-wide association studies where, due to rarity of the disorder, obtaining sufficiently large samples remains challenging.<sup>14</sup>

Here, we provide a population-based cohort study of relative recurrence risk of postpartum psychosis in full siblings and cousins of birthing parents (individuals assigned female at birth) who had experienced postpartum psychosis following their first liveborn singleton childbirth. We utilised data from Swedish national registers to measure familial risk of postpartum psychosis by estimating relative recurrence risk. Relative recurrence risk is commonly used in genetic and family-based studies to quantify the risk of a specific condition occurring in one individual within a family, based on the presence of the same condition in another family member. The term "relative recurrence risk" emphasises familial aggregation of the condition. Relative recurrence risk does not imply the actual recurrence of the condition within the same individual

but rather the increased likelihood of its appearance in another individual within the family (recurrence in the family). Relative recurrence risk can be used to compare the risk of the condition among families to the risk observed in unrelated individuals, as calculated by the population prevalence.

In this study, we compared relative recurrence risk across different family relationship types. In light of previous findings that postpartum psychosis occurred more in women with bipolar disorder and family history of postpartum psychosis in a first-degree relative, compared to women with bipolar disorder but no family history,<sup>11,12</sup> we hypothesised that relative recurrence risk for postpartum psychosis varies by degree of genetic relatedness and is higher in full siblings than in cousins.

## **Methods**

### **Study population**

This cohort study used data from Swedish national registers. Swedish healthcare covers all residents, and their healthcare data are collected in national registers. Information across registers is linked using individuals' personal identity numbers. We used data from the Medical Birth Register (MBR)<sup>15</sup> to select all birthing parents (individuals assigned female at birth) with their first ever liveborn singleton childbirth between January 1, 1980, and October 31, 2017, and followed up to December 31, 2017. The MBR was established in 1973 and contains birth and neonatal information on approximately 98% of all births in Sweden. Data quality of the MBR is high, owing to semi-automated data extractions from resident electronic health records and data quality controls for completeness and errors by the government agency National Board of Health and Welfare (Socialstyrelsen).<sup>15</sup>

To identify full sibling and cousin pairs of birthing parents, we extracted family information from the Multi-Generation Register (MGR)<sup>16</sup> and identified full siblings and same-sex cousin relationships (siblings and cousins assigned female at birth). Precursors to the MGR—personal records—were established in Sweden in 1947 and the MGR collects information from individuals born in Sweden from 1932 onwards. The MGR includes personal records and relationships to biological and adoptive parents. The MGR has a coverage of 97% of mothers and 95% of fathers of index individuals.<sup>17</sup> The data quality of the MGR is also high, as data are regularly audited for errors and cross-checked with other Swedish registers by the government agency

Statistics Sweden.<sup>16</sup> Ethical approval and waiver of informed consent (which is not required for the use of register data) were obtained from the Regional Ethical Review Board in Stockholm, Sweden.

## Measures

### *Outcome: Postpartum psychosis*

Diagnostic information about postpartum psychosis was obtained from the National Patient Register (NPR). The NPR collects information on psychiatric hospital admissions in Sweden occurring after 1973. Inpatient coverage in NPR became nationwide in 1987, and outpatient psychiatric care started being recorded in 2001.<sup>18</sup> Psychiatric diagnoses coverage grew from 86% in 1973 to over 99% of diagnoses being currently recorded. Since the start of the patient register, 3.1% of psychiatric primary diagnoses have been missing.<sup>19</sup> NPR data are quality controlled by Socialstyrelsen for errors, with suspected errors corrected by requesting new practitioner data.<sup>18</sup> Diagnoses were made by a clinical specialist and recorded in NPR using the International Classification of Diseases (ICD) codes. In Sweden, ICD Eighth Revision (ICD-8) was used 1968-1986, ICD-9 was used 1987-1996, and ICD-10 has been in use since January 1, 1997.

Postpartum psychosis is currently an umbrella term<sup>20</sup> with no official diagnostic criteria, as it has not been included in the DSM. Thus, to determine postpartum psychosis cases, we used the diagnostic classification which has been widely used in the literature: patients with mania and/or psychosis with onset postpartum.<sup>5</sup> For the main analysis, we selected disorders with symptom onset present in birthing parents within 0-3 months following their first liveborn singleton childbirth. We selected the period of up to three months to provide a broad coverage of the disorder onset period.<sup>2-4,21,22</sup>

To cover all episodes with mania and psychosis with onset postpartum, we included the following diagnoses using ICD-8, 9 and 10 codes: brief psychotic disorder, psychotic disorders not due to a substance or known physiological conditions, manic episode, bipolar disorder, major depressive disorder, single episode, severe with psychotic features, recurrent depressive disorder, current episode severe with psychotic symptoms features, and puerperal psychosis (ICD codes are listed in Table S1 in the Supplement).

We included two covariates in the analyses. The first one was age of the birthing

parent at first childbirth (measured in years), given that older age at delivery has been linked to increased risk of hospital admissions for postpartum psychosis among Swedish first-time mothers.<sup>23</sup> The second covariate was history of any diagnosis of bipolar disorder before giving birth.

We also conducted two sensitivity analyses (see *Statistical analysis* below), for which we first used a subsample with inpatient diagnoses only, to address severity of postpartum psychosis. We defined an inpatient diagnosis of postpartum psychosis if any of the diagnoses mentioned above (recorded with the ICD code[s]) was given during a stay in an inpatient care unit within three months of the first ever childbirth. If any diagnostic codes were given in outpatient care only, we defined the diagnosis as an outpatient diagnosis of postpartum psychosis. For the second sensitivity analysis, we used a subsample with cases with ICD-10 code diagnoses only (Table S1), to limit diagnostic heterogeneity in the sample.

### **Statistical analysis**

The relative recurrence risk can be calculated in different ways depending on the study design and available data. One approach involves comparing the prevalence of a condition in individuals with a family history to the prevalence in the general population. This approach relies on accurate population prevalence data, which may be limited or outdated. Furthermore, this approach does not account for other confounding factors. Another approach involves logistic regression, which estimates an odds ratio, indicating the relative increase or decrease in the odds of a condition occurring in individuals with a family history of a condition compared to those without. This approach does not rely on population prevalence and allows for an adjustment of potential confounding factors in the model. However, it provides a sample-specific estimate of relative recurrence risk and may not facilitate direct comparisons across different studies or populations.

In this study, we used the latter approach to calculate the relative recurrence risk of postpartum psychosis in full siblings/cousins. This risk represents the likelihood of individuals with a sibling/cousin having a history of postpartum psychosis developing the condition, compared to individuals with a sibling/cousin without a history of postpartum psychosis. First, we extracted all pairs of full siblings (sibling1, sibling2). We performed logistic regression by using sibling1 disease status as the predictor and sibling2 disease status as the outcome (with and without adjustment for the sibling2

age at birth and history of bipolar disorder covariates). We then repeated these analyses for all pairs of same-sex cousins (cousin1, cousin2) with postpartum psychosis diagnosis. We performed the analyses for all individuals who received a diagnosis of postpartum psychosis (in either inpatient or outpatient care). We calculated a 95% profile likelihood confidence interval for each parameter.

We then completed sensitivity analyses to test the robustness of the relative recurrence risk estimates. We first repeated the analysis restricting it to individuals who had an inpatient diagnosis of postpartum psychosis, a proxy for greater disorder severity. Then, to ensure consistency in definitions across various versions of ICD codes, we limited the sample to individuals with ICD-10 diagnosis codes only and recalculated the relative recurrence risk estimates.

We conducted all analyses with R version 4.0.5, using two functions from the R package *stats*: the *glm* function to fit logistic regressions and the *confint* function to obtain 95% confidence intervals of the exponents of the parameter estimates.

The funder of the study had no role in study design, data collection, data analysis, data interpretation, or writing of the report.

## **Results**

The cohort included all liveborn singleton childbirths in Sweden between January 1, 1980, and October 31, 2017, and followed up to December 31, 2017. The cohort included 1,633,535 birthing parents, of whom 2,489 (0.15%) experienced postpartum psychosis within three months of their first ever childbirth (Figure 1 and Table 1). Of those, 1,131 individuals were full siblings, and 1,205 were cousins. Of individuals with the diagnosis of postpartum psychosis, 1,221 (49.0%) had a history of bipolar disorder.

**Table 1.** Sample characteristics.

|                      | Total n   | PP diagnosis;<br>n (% of total) | Inpatient PP<br>diagnosis;<br>n (%) <sup>a</sup> | Outpatient PP<br>diagnosis;<br>n (%) <sup>a</sup> | History of BP;<br>n (% of total) | History of BP<br>among PP<br>birthing<br>parents;<br>n (% of PP) <sup>a</sup> | Age at<br>childbirth;<br>mean (SD) |
|----------------------|-----------|---------------------------------|--------------------------------------------------|---------------------------------------------------|----------------------------------|-------------------------------------------------------------------------------|------------------------------------|
| <b>Full sample</b>   | 1,633,535 | 2,489 (0.15%)                   | 2163 (86.9%)                                     | 326 (13.1%)                                       | 3,707 (0.2%)                     | 1,221 (49.0%)                                                                 | 29.9 (5.5)                         |
| <b>Full siblings</b> | 861,118   | 1,131 (0.13%)                   | 989 (87.4%)                                      | 142 (12.6%)                                       | 1,488 (0.2%)                     | 500 (44.2%)                                                                   | 29.0 (5.1)                         |
| <b>All cousins</b>   | 452,188   | 1,205 (0.27%)                   | 1,004 (83.3%)                                    | 201 (16.7%)                                       | 2,560 (0.6%)                     | 813 (67.5%)                                                                   | 27.4 (4.5)                         |

<sup>a</sup>Percentage breakdown of the diagnoses is the percentage out of the total number of postpartum psychosis (PP) cases. PP, postpartum psychosis; BP, bipolar disorder

**Figure 1.** Flow chart of the study population selection.

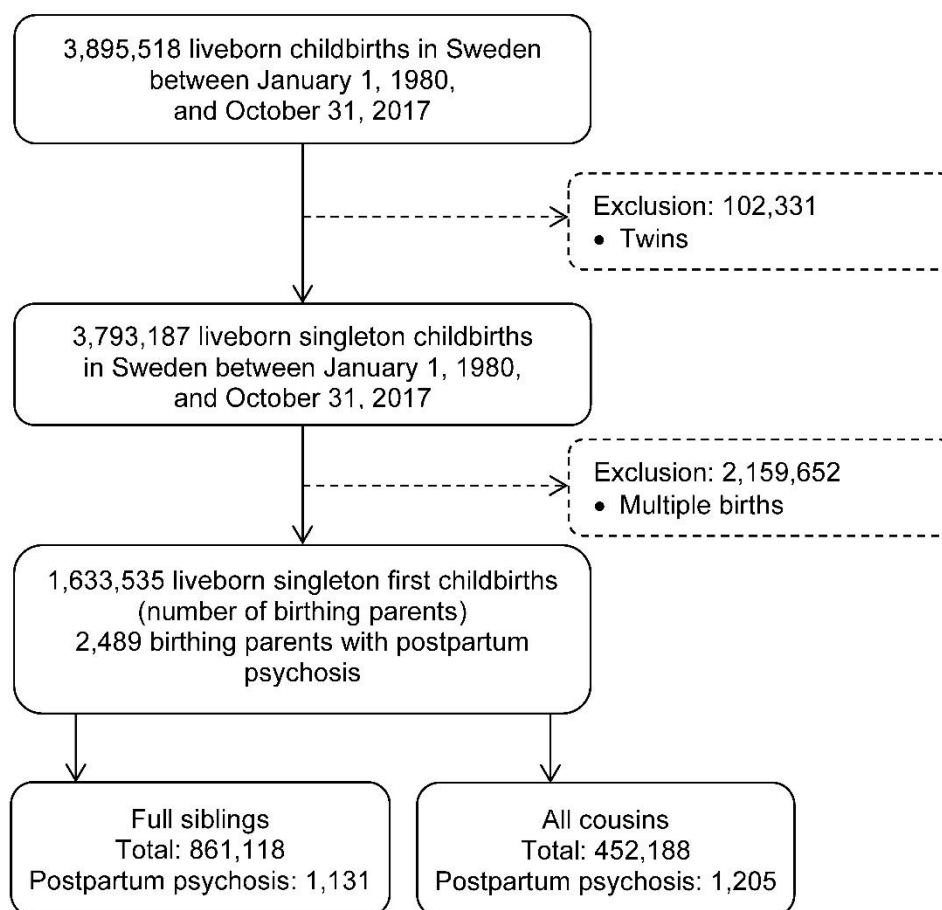

In full siblings with postpartum psychosis following childbirth, compared to those with no diagnosis, relative recurrence risks were high and statistically significant in full siblings (relative recurrence risk unadjusted for covariates = 13.92, 95% CI 8.61-21.12) and substantially lower and not statistically significant in cousins (unadjusted relative recurrence risk = 1.88 [95% CI 0.74-3.82]). This pattern was consistent across models both unadjusted for covariates and adjusted for age at birth. In models adjusted for both age at birth and history of bipolar disorder, relative recurrence risk remained significant for full siblings, but decreased from 13.92 to 7.27. In cousins, in the model adjusted for age at birth and history of bipolar disorder, the relative recurrence risk of postpartum psychosis was not significant (with a confidence interval that does not exclude 1).

Additionally, in full siblings, the relative recurrence risk for a more severe form of postpartum psychosis, requiring inpatient admission (adjusted for age at birth) was even higher than the relative recurrence risk for postpartum psychosis in both in- and



outpatients. This result was not significant in the sample of cousins with an inpatient diagnosis (Table 2, Table S2).

**Table 2.** Relative recurrence risks for postpartum psychosis among siblings and same-sex cousins of birthing parents.

| Model and sample type/diagnosis type                                                 | Full siblings |               | Cousins |             |
|--------------------------------------------------------------------------------------|---------------|---------------|---------|-------------|
|                                                                                      | RRR           | 95% CI        | RRR     | 95% CI      |
| <b>Unadjusted model</b><br>Inpatient and outpatient                                  | 13.92         | (8.61-21.12)  | 1.88    | (0.74-3.82) |
| <b>Adjusted model for age at birth</b><br>Inpatient and outpatient                   | 13.77         | (8.52-20.91)  | 1.88    | (0.74-3.82) |
| <b>Adjusted model for age at birth and history of BP</b><br>Inpatient and outpatient | 7.27          | (3.65-13.57)  | 1.47    | (0.52-3.61) |
| <b>Adjusted model for age at birth</b><br>Inpatient                                  | 18.13         | (11.12-27.57) | 0.90    | (0.15-2.79) |
| <b>Adjusted model for age at birth</b><br>Inpatient and outpatient - ICD 10 only     | 9.81          | (5.21-16.66)  | -       | -           |

RRR, relative recurrence risk; 95% CI, 95% confidence intervals; BP, bipolar disorder

As a next step, we limited the sample to individuals with ICD-10 diagnosis codes only and re-estimated the relative recurrence risk. We excluded all birthing parents who gave birth prior to January 1997 in our dataset, as ICD-10 was implemented in Sweden in 1997. This subcohort included 859,385 birthing parents, of whom 1,849 (0.21%) experienced postpartum psychosis. We estimated a full sibling relative recurrence risk of 9.81 (95% CI 5.21-16.66; Table 2). We could not estimate the risk among cousins since there were no concordant cousin pairs.

## **Discussion**

Using population-based, Swedish register data, we have conducted an analysis of familial risk in postpartum psychosis and identified that full siblings of individuals with a diagnosis of first-onset postpartum psychosis have an increased relative recurrence risk for the disorder. An increased disorder risk among full siblings can likely be attributed to a combination of both genetic factors and shared environment. Shared environment refers to environmental factors that siblings who live together commonly experience. Shared environment makes family members similar to one another beyond what can be explained by genetic influence alone.

We also found that, in models adjusted for age at birth and history of bipolar disorder before birth, the relative recurrence risk for full siblings was statistically significant but lower than in models only adjusted for age at birth. This finding may be partly explained

by the presence of confounding in the original estimate. By further adjusting for the history of bipolar disorder, we are able to partially account for this confounding effect. This is consistent with previous findings that women with a history of bipolar disorder are at high risk for postpartum relapse.<sup>24</sup> This interpretation is consistent with a recent study of polygenic risk scores in postpartum psychosis.<sup>10</sup> In that study, both women with first-onset postpartum psychosis and parous women with a history of bipolar disorder had comparable relative risk ratios for schizophrenia and bipolar disorder polygenic scores, which were higher than in controls.

In our study, we further observed an increased risk of postpartum psychosis among cousins, but lower than in full siblings. Typically, shared environmental effects are minimised and assumed to be negligible among cousin pairs in a large sample. Therefore, a high disease risk among cousins indicates an impact of genetic factors. However, our result should be interpreted with caution, since the confidence intervals for relative recurrence risk for cousins were wide and included the value of one, possibly due to the small size of the cousin sample. Therefore, we cannot accurately separate genetic effects from shared environmental effects. Nevertheless, our findings align with previous research showing a genetic contribution to the risk of postpartum psychosis, as women with first-onset postpartum psychosis exhibited significantly higher relative risk ratios for polygenic risk scores related to schizophrenia and bipolar disorder compared to controls.<sup>10</sup>

We demonstrated a similarly high full siblings relative recurrence risk when we restricted the analysis to ICD-10 codes to limit heterogeneity in diagnoses based on different ICD code definitions. We further observed that the magnitude of postpartum psychosis recurrence risk was even higher for full siblings with an inpatient diagnosis (adjusted relative recurrence risk = 18.13, 95% CI 11.21-27.57) than recurrence risk in all full siblings (adjusted relative recurrence risk = 13.77, 95% CI 8.52-20.91).

We also estimated a prevalence of 0.15% for postpartum psychosis, which is comparable to previous Swedish register reports of 0.12% between 1975-2003<sup>25</sup> and 1983-2000.<sup>22</sup>

This study has multiple strengths. Our use of a population-based sample potentially limits selection bias. Previous studies of postpartum psychosis largely recruited small

clinical samples of patients with postpartum psychosis and other pre-existing psychiatric diagnoses, which may result in patient self-selection bias.

However, register data also have several limitations. As the data are available for diagnoses, there may be a time lag between the actual timing of disorder onset and patients seeking care. Postpartum psychosis is a severe disorder with symptoms often presenting a dramatic departure from previous patient functioning, frequently within days after childbirth, with an estimated median onset of day 8.<sup>26</sup> While some patients are referred to care immediately, there might be a time lag between onset, seeking care, and diagnosis, also due to fluctuations of symptoms. To include patients with a potential diagnostic delay in our sample, we selected a diagnostic period of 0-3 months postpartum for analyses.

The count of cousins from the birthing parents may be lower than expected and less complete compared to the number of siblings. To establish cousins of birthing parents, family information from four generations back is required, given that the birthing parents themselves belong to the second generation. In comparison, establishing birthing parents' siblings requires less information, from three generations back. Tracing family trees increasingly further back in time is challenging since data from the early years of registers are frequently less complete than more recent patient data. Thus, obtaining complete family relationships from the Swedish Multi-Generation Register, or any similar register, can be more challenging for cousins compared to siblings.

We have also not addressed different types of peripartum experience, such that whether familial recurrence risk for postpartum psychosis differs in individuals giving birth following in vitro fertilisation (IVF) treatment, miscarriage, stillbirth, or abortion. Previous research in Swedish registers found no higher risk for postpartum psychosis in women giving birth after IVF treatment compared to women giving birth after spontaneous conception.<sup>27</sup> Studies in women with bipolar disorder showed an increased risk for mania/psychosis after miscarriage, stillbirth, and abortion, which was lower than risk after livebirths.<sup>28</sup>

We limited our sample to livebirths for two reasons. First, the Medical Birth Register has a more complete coverage of livebirths than stillbirths, miscarriages, or abortions, as the MBR intends to cover perinatal information on all livebirths, but only records

information on stillbirths from 22 completed gestational weeks, and not prior.<sup>15</sup> Second, we limited the sample to livebirths to avoid potential confounding with genetic or psychological factors, such as stress, which may drive pregnancy termination or stillbirth. Current findings on stress, stillbirth, and postpartum psychosis are limited and somewhat mixed. Postpartum psychosis at delivery has been found to be related to stillbirth,<sup>29</sup> but not to severe stress and bereavement shortly before or during pregnancy (although also note that the study on bereavement did not address stillbirth).<sup>30</sup> Further research on these risk factors is crucial for improved patient risk screenings.

Our results provide guidance for clinicians working with pregnant individuals with personal or family histories of postpartum psychosis. Our findings suggest that siblings of women who have experienced postpartum psychosis should be counselled that their own risk is elevated, although the absolute risk for the disorder remains small. Furthermore, the finding of a potential genetic contribution to postpartum psychosis risk suggests that heritable factors should also be considered in future studies of causes and precipitants of postpartum psychotic episodes.

### **Contributions:**

Study concept and design: VB, APK, BM

Acquisition, analysis, or interpretation of data: VB, KH, APK, XL, BM, TMO, TKR

Drafting of the manuscript: VB, APK, BM

Critical revision of the manuscript for important intellectual content: All authors

Statistical analysis: APK, BM

Obtained funding: VB, BM

Study supervision: VB, BM

### **Declaration of interests**

We declare no competing interests.

## **Data sharing**

Data may be obtained from a third party and are not publicly available. Data cannot be shared publicly owing to restrictions by law. Data are available from the National Medical Registries in Sweden after approval by the Swedish Ethical Review Authority.

## **Acknowledgments**

This study was supported by a grant from the Beatrice and Samuel A. Seaver Foundation (BM); and the National Institute of Mental Health (NIMH), R21MH131933 (VB, KH, APK, BM, TMO, TKR). The computation was performed on resources provided by SNIC through Uppsala Multidisciplinary Center for Advanced Computational Science (UPPMAX) under Project SENS-2018-588.

## **References**

- 1 Bergink V, Rasgon N, Wisner KL. Postpartum Psychosis: Madness, Mania, and Melancholia in Motherhood. *Am J Psychiatry* 2016; **173**: 1179–88.
- 2 Langan Martin J, McLean G, Cantwell R, Smith DJ. Admission to psychiatric hospital in the early and late postpartum periods: Scottish national linkage study. *BMJ Open* 2016; **6**: e008758.
- 3 Munk-Olsen T, Maegbaek ML, Johannsen BM, *et al.* Perinatal psychiatric episodes: a population-based study on treatment incidence and prevalence. *Transl Psychiatry* 2016; **6**: e919–e919.
- 4 VanderKruik R, Barreix M, Chou D, *et al.* The global prevalence of postpartum psychosis: a systematic review. *BMC Psychiatry* 2017; **17**: 272.
- 5 Meltzer-Brody S, Howard LM, Bergink V, *et al.* Postpartum psychiatric disorders. *Nat Rev Dis Primer* 2018; **4**: 18022.
- 6 Fusté M, Pauls A, Worker A, *et al.* Brain structure in women at risk of postpartum psychosis: an MRI study. *Transl Psychiatry* 2017; **7**: 1286.
- 7 Bergink V, Burgerhout KM, Weigelt K, *et al.* Immune System Dysregulation in First-Onset Postpartum Psychosis. *Biol Psychiatry* 2013; **73**: 1000–7.
- 8 Kumar MM, Venkataswamy MM, Sathyanarayanan G, Thippeswamy H, Chandra PS, Mani RS. Immune system aberrations in postpartum psychosis: An

- immunophenotyping study from a tertiary care neuropsychiatric hospital in India. *J Neuroimmunol* 2017; **310**: 8–13.
- 9 Aas M, Vecchio C, Pauls A, *et al.* Biological stress response in women at risk of postpartum psychosis: The role of life events and inflammation. *Psychoneuroendocrinology* 2020; **113**: 104558.
  - 10 Di Florio A, Mei Kay Yang J, Crawford K, *et al.* Post-partum psychosis and its association with bipolar disorder in the UK: a case-control study using polygenic risk scores. *Lancet Psychiatry* 2021; **8**: 1045–52.
  - 11 Jones I, Craddock N. Familiality of the Puerperal Trigger in Bipolar Disorder: Results of a Family Study. *Am J Psychiatry* 2001; **158**: 913–7.
  - 12 Jones I, Craddock N. Do puerperal psychotic episodes identify a more familial subtype of bipolar disorder? Results of a family history study. *Psychiatr Genet* 2002; **12**.
  - 13 Thippeswamy H, Paul P, Purushottam M, Philip M, Jain S, Chandra PS. Estrogen pathway related genes and their association with risk of postpartum psychosis: A case control study. *Asian J Psychiatry* 2017; **26**: 82–5.
  - 14 Mahon PB, Payne JL, MacKinnon DF, *et al.* Genome-Wide Linkage and Follow-Up Association Study of Postpartum Mood Symptoms. *Am J Psychiatry* 2009; **166**: 1229–37.
  - 15 Cnattingius S, Källén K, Sandström A, *et al.* The Swedish medical birth register during five decades: documentation of the content and quality of the register. *Eur J Epidemiol* 2023; **38**: 109–20.
  - 16 Ludvigsson JF, Almqvist C, Bonamy A-KE, *et al.* Registers of the Swedish total population and their use in medical research. *Eur J Epidemiol* 2016; **31**: 125–36.
  - 17 Ekblom A. The Swedish Multi-generation Register. In: Dillner J, ed. *Methods in Biobanking*. Totowa, NJ: Humana Press, 2011: 215–20.
  - 18 Socialstyrelsen (The Swedish National Board of Health and Welfare). National Patient Register - Socialstyrelsen. 2022; published online Jan 14. <https://www.socialstyrelsen.se/en/statistics-and-data/registers/national-patient-register/> (accessed March 19, 2023).
  - 19 Ludvigsson JF, Andersson E, Ekblom A, *et al.* External review and validation of the Swedish national inpatient register. *BMC Public Health* 2011; **11**: 450.
  - 20 Di Florio A, Munk-Olsen T, Bergink V. The birth of a psychiatric orphan disorder: postpartum psychosis. *Lancet Psychiatry* 2016; **3**: 502.
  - 21 Harlow BL, Vitonis AF, Sparen P, Cnattingius S, Joffe H, Hultman CM. Incidence of Hospitalization for Postpartum Psychotic and Bipolar Episodes in Women With and Without Prior Prepregnancy or Prenatal Psychiatric Hospitalizations. *Arch Gen Psychiatry* 2007; **64**: 42.

- 22 Valdimarsdóttir U, Hultman CM, Harlow B, Cnattingius S, Sparén P. Psychotic Illness in First-Time Mothers with No Previous Psychiatric Hospitalizations: A Population-Based Study. *PLoS Med* 2009; **6**: e1000013.
- 23 Nager A, Johansson L-M, Sundquist K. Are sociodemographic factors and year of delivery associated with hospital admission for postpartum psychosis? A study of 500 000 first-time mothers. *Acta Psychiatr Scand* 2005; **112**: 47–53.
- 24 Wesseloo R, Kamperman AM, Munk-Olsen T, Pop VJM, Kushner SA, Bergink V. Risk of Postpartum Relapse in Bipolar Disorder and Postpartum Psychosis: A Systematic Review and Meta-Analysis. *Am J Psychiatry* 2016; **173**: 117–27.
- 25 Nager A, Sundquist K, Ramírez-León V, Johansson LM. Obstetric complications and postpartum psychosis: a follow-up study of 1.1 million first-time mothers between 1975 and 2003 in Sweden. *Acta Psychiatr Scand* 2008 ;**117(1)**: 12-9.
- 26 Bergink V, Lambregtse-van Den Berg MP, Koorengevel, KM, Kupka R, Kushner SA. First-Onset Psychosis Occurring in the Postpartum Period: A Prospective Cohort Study. *J Clin Psychiatry* 2011; **72**: 1531–7.
- 27 Vikström J, Josefsson A, Hammar M, Bladh M, Sydsjö G. Risk of postpartum psychosis after IVF treatment: a nationwide case-control study. *Hum Reprod* 2016; : humrep;dew302v1.
- 28 Gilden J, Poels EMP, Lambrichts S, *et al.* Bipolar episodes after reproductive events in women with bipolar I disorder, A study of 919 pregnancies. *J Affect Disord* 2021; **295**: 72–9.
- 29 Albers SM, Wen T, Monk C, *et al.* Postpartum Psychosis during Delivery Hospitalizations and Postpartum Readmissions, 2016-2019. *Am J Obstet Gynecol MFM* 2023; : 100905.
- 30 Warselius P, Cnattingius S, Li J, *et al.* Maternal bereavement shortly before or during pregnancy and risk of postpartum psychotic illness: a population-based study from Denmark and Sweden. *Clin Epidemiol* 2019; **Volume 11**: 285–98.
